# Supplementary material
Source: PubMed Central journal article supplement (PMC6757509)
Supplement: sp9b00118_si_001.pdf [file sp9b00118_si_001.pdf]

# Secondary Organic Aerosol Formation from Healthy and Aphid-Stressed Scots Pine Emissions

Authors: Celia L. Faiola<sup>1,2\*</sup>, Iida Pullinen<sup>3</sup>, Angela Buchholz<sup>3</sup>, Farzaneh Khalaj<sup>1</sup>, Arttu Ylisirniö<sup>3</sup>, Eetu Kari<sup>3</sup>, Pasi Miettinen<sup>3</sup>, Jarmo K. Holopainen<sup>4</sup>, Minna Kivimäenpää<sup>4</sup>, Siegfried Schobesberger<sup>3</sup>, Taina Yli-Juuti<sup>3</sup>, and Annele Virtanen<sup>3</sup>

<sup>1</sup>Department of Ecology and Evolutionary Biology, University of California Irvine, Irvine, CA, USA, 92697

<sup>2</sup>Department of Chemistry, University of California Irvine, Irvine, CA, USA 92697

<sup>3</sup>Department of Applied Physics, University of Eastern Finland, P.O. Box 1626, 70211 Kuopio, Finland

<sup>4</sup>Department of Environmental and Biological Sciences, University of Eastern Finland, P.O. Box 1627, 70211 Kuopio, Finland

\*corresponding author, cfaiola@uci.edu

## 1. Particle Wall Loss

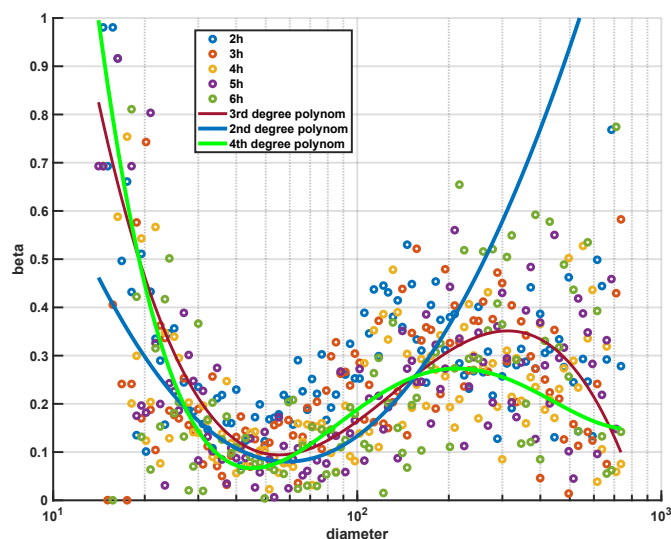

Figure S1: Particle wall loss coefficient as a function of particle diameter with 2<sup>nd</sup>, 3<sup>rd</sup>, and 4<sup>th</sup> degree polynomial fits.

Graph showing the size-dependent particle wall loss coefficient (beta, s<sup>-1</sup>) from polydisperse ammonium sulfate particles after 2 hours, 3 hours, 4 hours, 5 hours, and 6 hours. The 2<sup>nd</sup>, 3<sup>rd</sup>, and 4<sup>th</sup> order polynomials fit to the 5 hour data points are shown with the blue, purple, and green lines, respectively. The 4<sup>th</sup> degree polynomial was used to correct the data:  $f(x)=1.13x^4-10.38x^3+34.8x^2-50.44x+26.78$ .

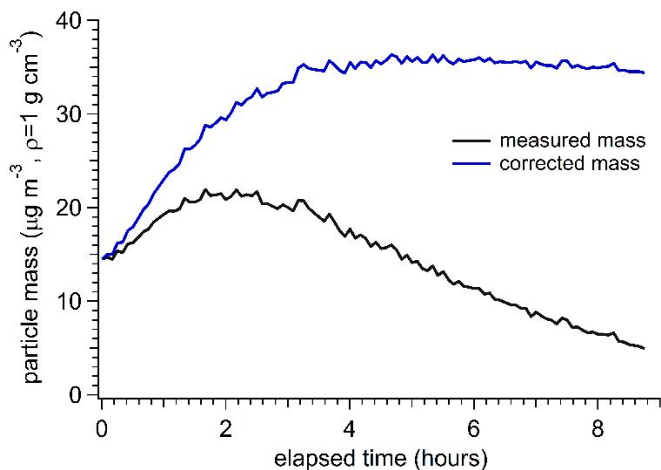

Figure S2: Sample of a wall loss corrected time series.

An example of a particle time-series from experiment H-OH-2 showing the measured mass calculated from SMPS data and the corrected mass after adding in the particle mass lost to the chamber walls.

## 2. Comparison of monoterpene oxidation by OH and ozone

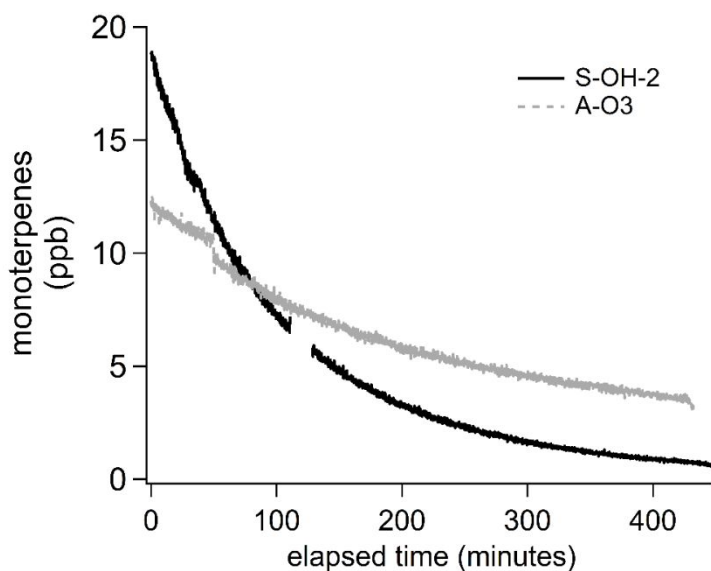

Figure S3: monoterpene mixing ratio in the chamber as a function of elapsed experiment time.

Time series of monoterpene mixing ratios in an example ozonolysis and photooxidation experiment. Monoterpenes reacted more quickly in the photooxidation experiment.
